# Supplementary material for: Effects of Launaea sarmentosa Extract on Lipopolysaccharide-Induced Inflammation via Suppression of NF-κB/MAPK Signaling and Nrf2 Activation
Source: Nutrients. 2020 Aug 26;12(9):2586. doi: 10.3390/nu12092586 (PMC7551017; doi:10.3390/nu12092586)
Supplement: Supplementary file 1 [file nutrients-12-02586-s001.pdf]

**Supplementary Table:** RT-qPCR amplification efficiency for proinflammatory genes. PCR amplification efficiency was determined for each gene by serial dilutions of target cDNA, described in the table.

| Gene           | Slope   | R <sup>2</sup> | Amplification efficiency (%) |
|----------------|---------|----------------|------------------------------|
| <i>iNOS</i>    | -3.318  | 0.9972         | 100.16                       |
| <i>COX-2</i>   | -3.2643 | 0.9922         | 102.46                       |
| <i>IL-6</i>    | -3.2633 | 0.9948         | 102.51                       |
| <i>IL-1β</i>   | -3.2471 | 0.9963         | 102.12                       |
| <i>CHOP</i>    | -3.2017 | 0.9961         | 101.35                       |
| <i>XBP-1</i>   | -3.3514 | 0.9760         | 98.87                        |
| <i>β-actin</i> | -3.2112 | 0.9931         | 104.37                       |

Primer's name; inducible nitric oxide synthase (*iNOS*), cyclooxygenase-2 (*COX-2*), interleukin-6 (*IL-6*), interleukin-1β (*IL-1β*), C/EBP homologous protein (*CHOP*), X-box binding protein 1 (*XBP-1*), β-Actin.
